# Supplementary material for: Prognostic significance of tumor genotypes and CD8+ infiltrates in stage I-III colorectal cancer
Source: PubMed Central journal article supplement (PMC6235022; doi:10.18632/oncotarget.26256), 2018-11-02
Supplement: oncotarget-09-35623-s001.pdf [file oncotarget-09-35623-s001.pdf]

## Prognostic significance of tumor genotypes and CD8+ infiltrates in stage I-III colorectal cancer

### SUPPLEMENTARY MATERIALS

#### Immunohistochemistry (IHC)

We applied IHC on 3um TMA sections. All protocols were carried out with a Bond Max autostainer (Leica Microsystems, Wezlar, Germany) using Bond Polymer Refine Detection kit DS9800 (Bond Max and Bond III autostainers (Leica Microsystems, Wezlar, Germany) according to the manufacturer's instructions. The antibodies and staining protocols used are presented in the Table below:

| Antibody* | Clone   | Code  | Staining protocol**       |
|-----------|---------|-------|---------------------------|
| CD8       | C8-144B | M7103 | 20min ER2, Ab 1:80, 20min |
| MLH1      | ES05    | M3640 | 20min ER2, Ab 1:50, 30min |
| MSH2      | FE11    | M3639 | 20min ER2, Ab 1:30, 30min |
| MSH6      | EP49    | M3646 | 20min ER2, Ab 1:70, 30min |
| PMS2      | EP51    | M3647 | 20min ER2, Ab 1:60, 30min |

\*: all antibodies from DAKO, Glostrup, DK

\*\*: Bond Polymers for all protocols

ER1: citric acid; ER2: EDTA

#### NGS genotyping

DNA was extracted from 8 X 10um thick TMA core sections with the QIAamp DNA Mini Kit (Qiagen GmbH, Hilden, Germany). A total of 412 FFPE DNA samples were prepared. DNA quantity was measured with the Qubit fluorometer (Life Technologies, Paisley, UK). Samples were not processed for NGS if DNA quantity was <2 ng/ul upon vacuum concentration to a minimum volume of 11ul. Based on this criterion, we processed DNA samples from 404 tumors.

We performed targeted NGS with a custom Ampliseq panel (Applied Biosystems/Ion Torrent/Thermo – Fisher Scientific, Paisley, UK), designed primarily for usage with FFPE DNA. The panel is described in Supplementary Table 1; targets included TCGA reported mutations in CRC, as well as coding regions of mismatch repair (MMR) and homologous recombination (HRR) genes. The design was based on GRCh37 (hg19) reference DNA and finally included 1271 amplicons, targeting a total region of approximately 120.8Kb from 55 protein encoding genes and 4 miRNAs. Ampliseq designed primers were evaluated for specificity (BLAST). For library construction, a multiplex PCR was performed using 20 ng DNA per sample and the Ampliseq primers along with the Ion AmpliSeq™ Library Kit 2.0

and Ion Xpress barcodes, according to the manufacturer's instructions (Life Technologies, Carlsbad, CA). Sample libraries, once normalized to 15 ng/ml with the Qubit fluorometer (Thermo, Fisher Scientific, Waltham, MA) were processed on a One-Touch-2 instrument followed by enrichment on a One-Touch-ES station. Templating was carried out using the Ion PI™ Hi-Q™ OT2 200 Kit, whereas sequencing of up to 48 sample libraries was performed with the Ion PI™ Hi-Q™ Sequencing 200 Kit on PI chips (Life Technologies, Carlsbad, CA) in an Ion Proton sequencer.

NGS data (base calling and the generation of sequence reads) were processed on the Torrent Server using Torrent Suite v.5, followed by adapter sequence trimming, read alignment to the human reference genome and variant calling. Annotated variants were retrieved from Ion Reporter v.5, raw annotated data were evaluated for the reads of all amplicons in the panel (provided by the embedded coverage analysis plug-in) and further quality filtered for accepting eligible variants. We applied the following steps for data quality control (QC):

(i). Panel evaluation. The number of minimum required reads per amplicon was set at 100. Out of 1271 amplicons, 23 (1.8%) did not meet this criterion in any sample and were excluded from further analysis.

(ii). Sample evaluation. Samples were excluded from further analysis if: mapped reads <130000; mean depth <150X; uniformity <50%; number of variants <30; number of sequenced amplicons with coverage <100 among all eligible amplicons (threshold for acceptance: 500 eligible amplicons/sample). The mean depth threshold was set at 450X for samples without detected mutations.

(iii). Variant evaluation. Variants were ineligible for analysis if: duplicates; single nucleotide variants with amplicon and position reads <100 and indels with amplicon reads <200; variant coverage <40 for single nucleotide changes and <80 for small indels; p-value > 0.0001 (metric including read quality and false discovery rate); GC stretches; strand bias (+/- <10% for both position and variant coverage).

Based on the above criteria, we excluded 57 tumors (86% NGS efficiency).

#### Variant characterization

Variants were distinguished into: (a) common single nucleotide polymorphisms (SNPs), with average minor allele frequency (MAF) >0.1% taken from GO-

ESP, ExAC and 1000 Genomes, along with a valid dbSNP string; (b) mutations, for genetic variations in coding and adjacent intronic regions resulting in amino acid or splice site change (non-synonymous), with MAF <0.1%, based on the aforementioned sources. We further categorized mutations as clonal (>25% variant allele frequency [VAF] (McGranahan, Favero et al. 2015)) and as pathogenic, non-pathogenic (benign and of unknown significance) and of unknown function (no information could be found). Pathogenic mutations were returned as such by Ion Reporter with FATHMM, ClinVar and COSMIC (confirmed in each case); or, these were non-annotated, nonsense and frameshift mutations in tumor suppressor genes with >100 variant coverage, with clonal VAFs for the sample, i.e., >25% VAF in samples with >50% TCC, or >15% VAF in samples with <50% TCC. Position loss (LOH) was inferred for VAFs (mutated allele) >65%. Non-annotated variants were not evaluated for pathogenic status if they were G>A/C>T of non-clonal VAF according to TCC% as aforementioned, or if they were inadequately covered (<400 for the position or <100 for the variant).

Informative tumors were read at very high depth (technical characteristics and variant distribution are shown in Supplementary Figure 3). Out of ~50000

variants, we processed ~35000 for analysis, their number varying from 30 – 690 variants per tumor (mean 101; median 76). We identified 5231 amino acid or splice site changing mutations in 55 out of the 59 genes of our panel. Mutations (range 1 – 220; median 4; mean±SD 15±35) were distributed in 339/347 informative tumors (97.7%). Compared to non-pathogenic, pathogenic mutations exhibited significantly higher VAFs and differed in the distribution of functional types (both p's <0.0001; Supplementary Figure 4) including 64% missense, 24% nonsense and 8% frameshifts. Non-pathogenic mutations included 94% missense almost exclusively G>A/C>T changes that would be impossible to validate individually at VAFs <12%. For this reason, we next decided to analyze pathogenic mutations only, although pathogenicity inferred from the germline does not necessarily apply to the behaviour of the same changes in tissues.

## REFERENCES

1. McGranahan N, Favero F, de Bruin EC, Birkbak NJ, Szallasi Z, Swanton C. Clonal status of actionable driver events and the timing of mutational processes in cancer evolution. *Sci Transl Med.* 2015; 7:283ra54.

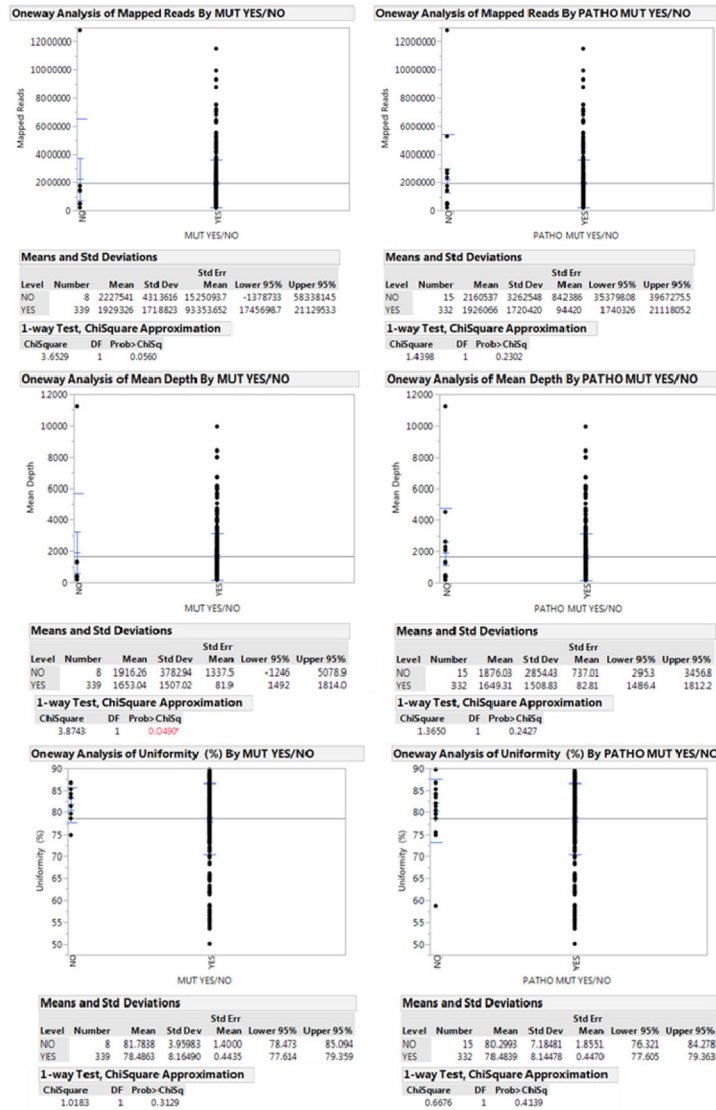

**Supplementary Figure 1: Technical characteristics of the 8 tumors without any detected mutation with the Ampliseq panel and of the 15 tumors without pathogenic mutations.** As shown in the graphs above, in comparison to tumors with mutations, tumors without mutations (left panel) and those without pathogenic mutations (right panel) had similar or slightly better technical performance metrics.

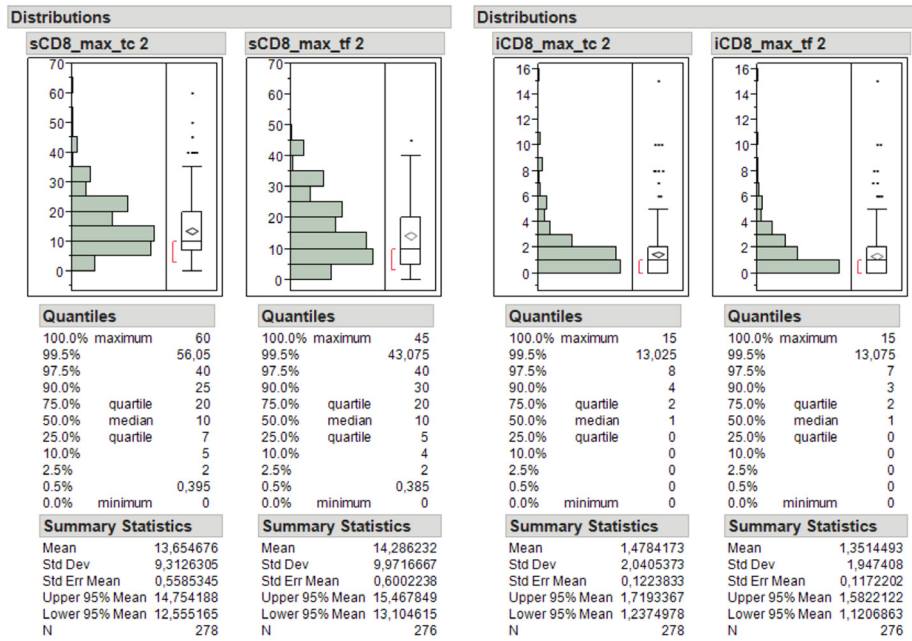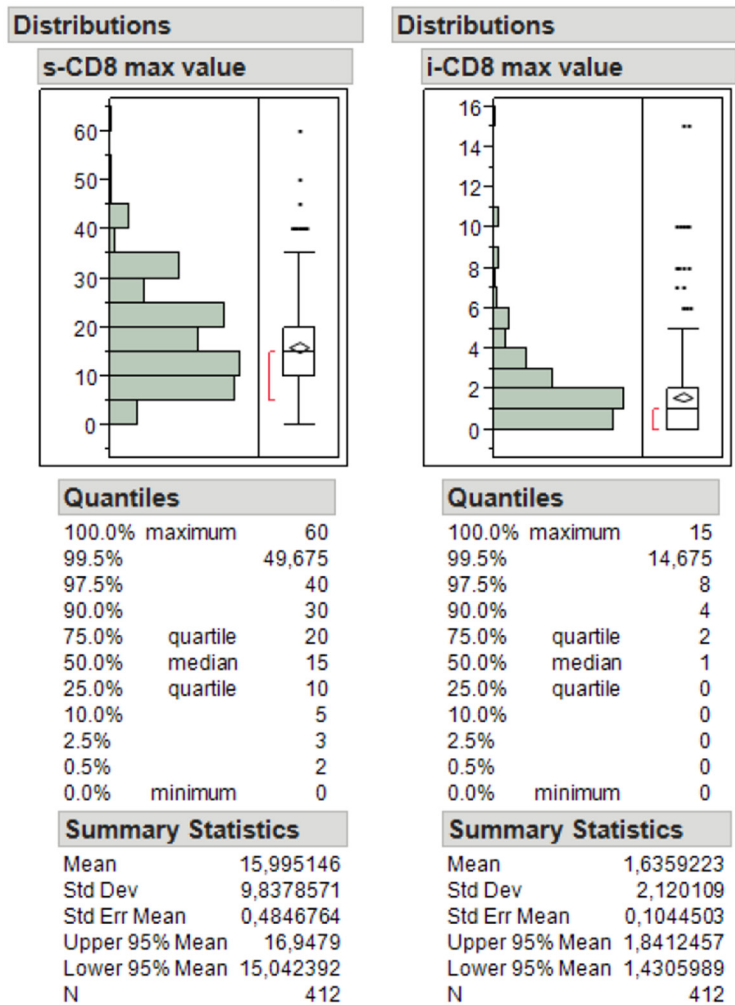

**Supplementary Figure 2: CD8 IHC evaluation. (A)** Similar distributions of maximal s-CD8 and i-CD8 counts were observed in the tumor center (tc) and the tumor invasive front (tf) in the 276 and 278 cases with available corresponding data. **(B)** Distribution of merged maximal s-CD8 and i-CD8 counts in all examined tumors.

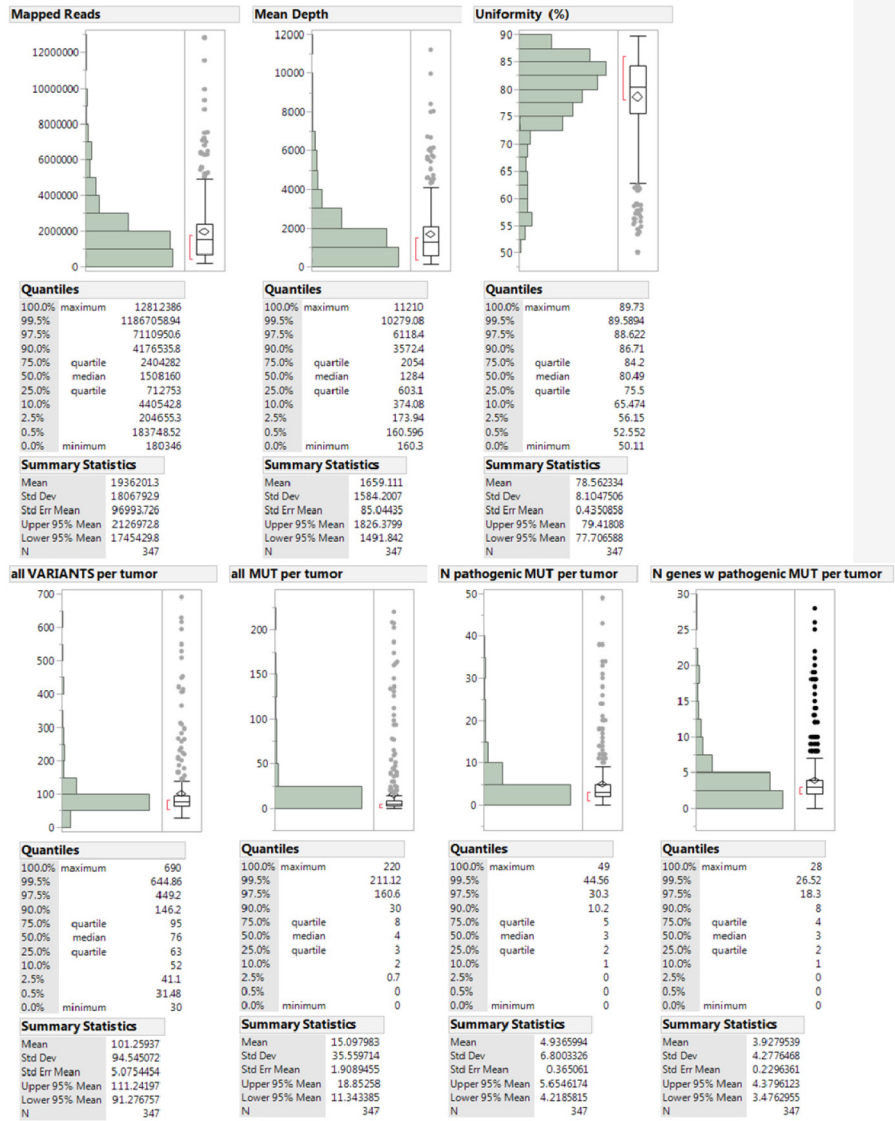

Supplementary Figure 3: Technical characteristics and variant distribution in the 347 NGS informative FFPE tumor samples.



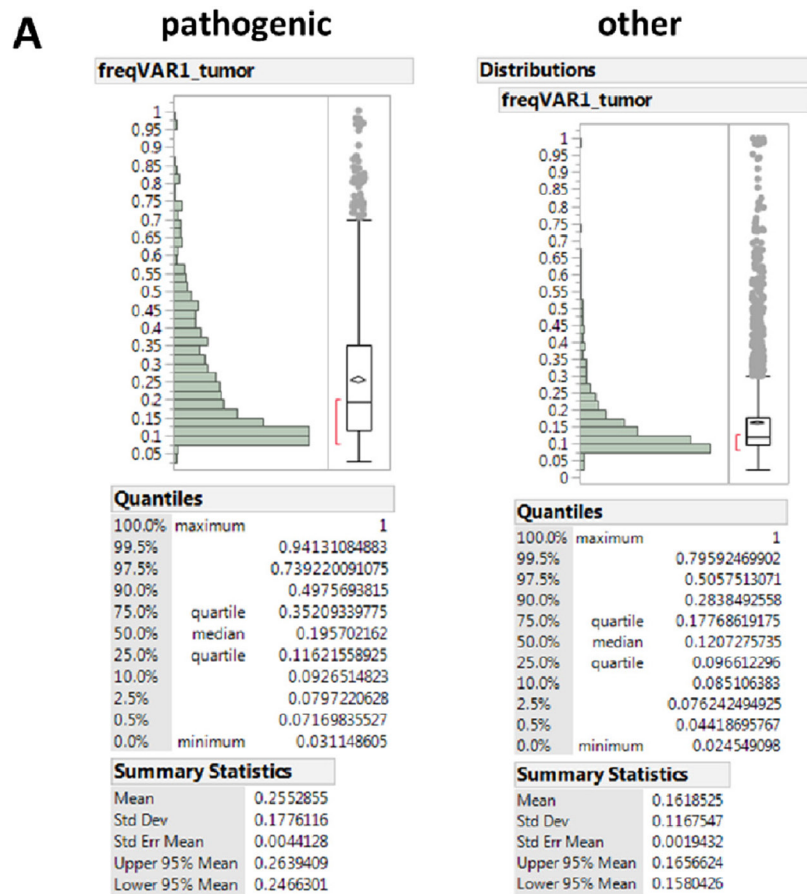

**B**

| Count         | Other        | Pathogenic   |      |
|---------------|--------------|--------------|------|
| Row %         |              |              |      |
| Frameshift    | 21<br>13.2   | 138<br>86.8  | 159  |
| Missense      | 3312<br>75.3 | 1102<br>24.9 | 4414 |
| Nonframeshift | 1<br>50.0    | 1<br>50.0    | 2    |
| Nonsense      | 110<br>20.5  | 425<br>79.4  | 535  |
| Unknown       | 82<br>63.6   | 47<br>36.4   | 129  |
|               | 3526         | 1713         | 5239 |

**Tests**

| N    | DF | .LogLike  | RSquare (U) |
|------|----|-----------|-------------|
| 5240 | 4  | 411,62785 | 0,1243      |

  

| Test             | ChiSquare | Prob>ChiSq |
|------------------|-----------|------------|
| Likelihood Ratio | 823,256   | <,0001*    |
| Pearson          | 865,266   | <,0001*    |

**Supplementary Figure 4: Comparison of all mutations and pathogenic mutations.** Pathogenic mutations were present at higher VAFs (A) and were more frequently frameshifts and nonsense (B) compared to non-pathogenic mutations (all p's <0.0001).

**Supplementary Table 1: Clinicopathological, immunophenotypic and genotypic parameters in association with MMR status**

| Parameters*                      | MMR             |                | p-value          |
|----------------------------------|-----------------|----------------|------------------|
|                                  | Deficiency      | Proficiency    |                  |
| <b>Age</b>                       |                 |                | <b>0.010</b>     |
| Mean (SD)                        | 59 (12)         | 64 (10)        |                  |
| Median (IQR)                     | 61 (49-69)      | 65 (57-72)     |                  |
| Min-Max                          | 38-76           | 28-80          |                  |
| <b>Gender</b>                    |                 |                | 0.681            |
| Female                           | 17 (42.5)       | 147 (45.9)     |                  |
| Male                             | 23 (57.5)       | 173 (54.1)     |                  |
| <b>Family history of cancer</b>  |                 |                | 0.99             |
| No                               | 12 (54.5)       | 111 (54.7)     |                  |
| Yes                              | 10 (45.5)       | 92 (45.3)      |                  |
| <b>Stage (excl. I)</b>           |                 |                | <b>0.041</b>     |
| II                               | 19 (52.8)       | 109 (35.4)     |                  |
| III                              | 17 (47.2)       | 199 (64.6)     |                  |
| <b>Grade</b>                     |                 |                | <b>&lt;0.001</b> |
| G1-G2                            | 22 (57.9)       | 260 (82.8)     |                  |
| G3                               | 16 (42.1)       | 54 (17.2)      |                  |
| <b>Mucinous component</b>        |                 |                | <b>0.008</b>     |
| No                               | 20 (55.6)       | 221 (76.2)     |                  |
| Yes                              | 16 (44.4)       | 69 (23.8)      |                  |
| <b>Perineural invasion</b>       |                 |                | 0.066            |
| No                               | 36 (94.7)       | 250 (83.3)     |                  |
| Yes                              | 2 (5.3)         | 50 (16.7)      |                  |
| <b>Lymphatic vessel invasion</b> |                 |                | 0.213            |
| No                               | 26 (68.4)       | 231 (77.5)     |                  |
| Yes                              | 12 (31.6)       | 67 (22.5)      |                  |
| <b>Blood vessel invasion</b>     |                 |                | 0.291            |
| No                               | 35 (92.1)       | 256 (85.9)     |                  |
| Yes                              | 3 (7.9)         | 42 (14.1)      |                  |
| <b>PNI+/-LVI</b>                 |                 |                | 0.504            |
| No                               | 23 (60.5)       | 198 (66.0)     |                  |
| Yes                              | 15 (39.5)       | 102 (34.0)     |                  |
| <b>CD8 density</b>               |                 |                | <b>&lt;0.001</b> |
| High                             | 26 (65.0)       | 85 (26.6)      |                  |
| Other                            | 14 (35.0)       | 235 (73.4)     |                  |
| <b>Mutated tumors</b>            |                 |                | N/A              |
| No                               | 0 (0)           | 8 (3.0)        |                  |
| Yes                              | 35 (100.0)      | 257 (97.0)     |                  |
| <b>Mutations per tumor</b>       |                 |                | <b>0.003</b>     |
| Mean +/- SD                      | 21.1 +/- 38.9   | 15.2 +/- 37.6  |                  |
| Median (IQR)                     | 6.0 (4.0, 18.0) | 4.0 (2.0, 7.0) |                  |
| Min-Max                          | 1-186           | 0-220          |                  |

(Continued)

| Parameters*                    | MMR            |                       | p-value |
|--------------------------------|----------------|-----------------------|---------|
|                                | Deficiency     | Proficiency           |         |
| <b>Pathogenic mutations</b>    |                |                       | 0.092   |
| Mean +/- SD                    | 6.3 +/- 7.4    | 4.9 +/- 7.2           |         |
| Median (IQR)                   | 3.0 (2.0, 6.0) | 3.0 (2.0, 4.0)        |         |
| Min-Max                        | 0-34           | 0-49                  |         |
| <b>Mutated genes per tumor</b> |                |                       | 0.073   |
| Mean +/- SD                    | 4.9 +/- 4.6    | 3.9 +/- 4.5           |         |
| Median (IQR)                   | 3.0 (2.0, 6.0) | 3.0 (2.0, 4.0)        |         |
| Min-Max                        | 0-18           | 0-28                  |         |
| <b>MMR MUT</b>                 |                |                       | 0.323   |
| No                             | 31 (88.6)      | 248 (93.6)            |         |
| Yes                            | 4 (11.4)       | 17 (6.4) <sup>^</sup> |         |
| <b>BRAF</b>                    |                |                       | <0.001  |
| No                             | 26 (74.3)      | 252 (95.1)            |         |
| Yes                            | 9 (25.7)       | 13 (4.9)              |         |
| <b>ALL RAS</b>                 |                |                       | 0.441   |
| No                             | 18 (51.4)      | 118 (44.5)            |         |
| Yes                            | 17 (48.6)      | 147 (55.5)            |         |
| <b>BRCA1</b>                   |                |                       | 0.682   |
| No                             | 31 (88.6)      | 228 (86.0)            |         |
| Yes                            | 4 (11.4)       | 37 (14.0)             |         |
| <b>ARID1A</b>                  |                |                       | 0.187   |
| No                             | 29 (82.9)      | 239 (90.2)            |         |
| Yes                            | 6 (17.1)       | 26 (9.8)              |         |

IQR = Interquartile range

\* analysis performed in informative samples

<sup>^</sup> We did not include 5 MSH3-mutated tumors in the analysis, because the MSH3 protein was not tested with immunohistochemistry.



**Supplementary Table 2: Clinicopathological characteristics and outcome in patients with BRAF p.V600E and non-V600E mutations**

| case | BRAF protein change         | TCC% | mutation VAF | Stage | MMR status    | CD8  | LEFT_<br>RIGHT_<br>RECTUM | N mutations per tumor | OS     | OS_index | DFS    | DFS_index |
|------|-----------------------------|------|--------------|-------|---------------|------|---------------------------|-----------------------|--------|----------|--------|-----------|
| 1    | p.Gln609Arg                 | 48.8 | 0.40         | III   | Proficiency   | low  | RIGHT                     | 5                     | 84.03  | 0        | 84.03  | 0         |
| 2    | p.Asn581Ser                 | 46.3 | 0.47         | III   | Proficiency   | high | RECTAL                    | 2                     | 73.28  | 0        | 73.28  | 0         |
| 3    | p.Asp594Gly                 | 65.0 | 0.20         | III   | Proficiency   | high | LEFT                      | 30                    | 112.66 | 0        | 112.66 | 0         |
| 4    | p.Arg444Gln                 | 55.0 | 0.08         | III   | Proficiency   | low  | RECTAL                    | 134                   | 113.64 | 0        | 113.64 | 0         |
| 5    | p.Val600Glu;<br>p.Ala598Thr | 50.0 | 0,16; 0,10   | II    | Deficiency    | low  | RECTAL                    | 78                    | 83.28  | 0        | 83.28  | 1         |
| 6    | p.Val600Glu                 | 60.0 | 0.11         | III   | not available | high | LEFT                      | 4                     | 110.89 | 0        | 110.89 | 0         |
| 7    | p.Val600Glu                 | 57.5 | 0.27         | III   | not available | high | LEFT                      | 5                     | 58.52  | 0        | 58.52  | 0         |
| 8    | p.Val600Glu                 | 76.7 | 0.36         | III   | not available | high | RIGHT                     | 3                     | 118.43 | 0        | 118.43 | 0         |
| 9    | p.Val600Glu                 | 72.5 | 0.20         | III   | Deficiency    | high | RIGHT                     | 3                     | 76.66  | 0        | 76.66  | 0         |
| 10   | p.Val600Glu                 | 28.3 | 0.23         | II    | Deficiency    | low  | RIGHT                     | 6                     | 98.23  | 0        | 98.23  | 0         |
| 11   | p.Val600Glu                 | 66.3 | 0.24         | III   | Deficiency    | high | RIGHT                     | 6                     | 70.33  | 0        | 70.33  | 0         |
| 12   | p.Val600Glu                 | 70.0 | 0.24         | III   | Deficiency    | high | RIGHT                     | 3                     | 69.87  | 0        | 69.87  | 0         |
| 13   | p.Val600Glu                 | 62.5 | 0.31         | II    | Deficiency    | high | RIGHT                     | 3                     | 97.18  | 0        | 97.18  | 0         |
| 14   | p.Val600Glu                 | 52.5 | 0.45         | II    | Deficiency    | high | RIGHT                     | 5                     | 73.93  | 0        | 73.93  | 0         |
| 15   | p.Val600Glu                 | 25.0 | 0.18         | II    | Proficiency   | low  | RIGHT                     | 3                     | 103.11 | 0        | 103.11 | 0         |
| 16   | p.Val600Glu                 | 65.0 | 0.18         | II    | Proficiency   | low  | LEFT                      | 6                     | 37.31  | 0        | 37.31  | 0         |
| 17   | p.Val600Glu                 | 46.3 | 0.35         | II    | Proficiency   | low  | LEFT                      | 136                   | 106.52 | 0        | 106.52 | 0         |
| 18   | p.Val600Glu                 | 57.5 | 0.19         | III   | Proficiency   | low  | RIGHT                     | 4                     | 49.28  | 0        | 19.84  | 1         |
| 19   | p.Val600Glu                 | 52.5 | 0.27         | III   | Proficiency   | low  | RIGHT                     | 4                     | 60.36  | 0        | 25.44  | 1         |
| 20   | p.Val600Glu                 | 25.0 | 0.24         | III   | not available | low  | LEFT                      | 6                     | 39.64  | 1        | 24.43  | 1         |
| 21   | p.Val600Glu                 | 38.8 | 0.16         | III   | Deficiency    | low  | RIGHT                     | 5                     | 71.77  | 1        | 71.77  | 1         |
| 22   | p.Val600Glu                 | 68.8 | 0.35         | III   | Deficiency    | low  | RIGHT                     | 7                     | 110.1  | 1        | 110.1  | 1         |
| 23   | p.Val600Glu                 | 42.5 | 0.18         | III   | Proficiency   | high | RIGHT                     | 2                     | 17.64  | 1        | 8.59   | 1         |
| 24   | p.Val600Glu                 | 46.7 | 0.20         | II    | Proficiency   | low  | LEFT                      | 4                     | 60.85  | 1        | 60.85  | 1         |
| 25   | p.Val600Glu                 | 10.0 | 0.23         | III   | Proficiency   | low  | RECTAL                    | 6                     | 13.7   | 1        | 7.02   | 1         |
| 26   | p.Val600Glu                 | 80.0 | 0.40         | III   | Proficiency   | high | RIGHT                     | 3                     | 21.21  | 1        | 14.72  | 1         |

TCC: tumor cell content; VAF: variant allelic frequency.

**Supplementary Table 3: Clinicopathological characteristics of tumors with MMR gene mutations compared to those classified as MMR-D with IHC**

| case | location | MMR status            | TCC% | MLH1 | protein variant        | VAF        | PMS2 | protein variant | VAF  | MSH2 | protein variant          | VAF        | MSH6 | protein variant | VAF  | N mutations | other clonal pathogenic                                                      |
|------|----------|-----------------------|------|------|------------------------|------------|------|-----------------|------|------|--------------------------|------------|------|-----------------|------|-------------|------------------------------------------------------------------------------|
| 1    | right    | deficient; MLH1; MSH2 | 56.3 |      | splice site c.790+1G>A | 0.44       |      |                 |      |      | p.Gln183Ter; p.Pro439Leu | 0.10; 0.14 |      |                 |      | 187         | BRCA1, splicing; c.4185+1G>A                                                 |
| 2    | rectal   | deficient; MLH1       | 35.0 |      | p.Asp41Val; p.Phe88fs  | 0.63; 0.20 |      |                 |      |      |                          |            |      |                 |      | 18          | none                                                                         |
| 3    | right    | deficient; MSH2       | 70.0 |      |                        |            |      |                 |      |      | p.Gln413Ter              | 0.46       |      |                 |      | 9           | KRAS; PIK3CA; TP53; PTEN; RB1                                                |
| 4    | left     | deficient; MSH6       | 46.3 |      |                        |            |      |                 |      |      |                          |            |      | p.Gln1146Ter    | 0.32 | 30          | POLE p.Ser297Phe                                                             |
| 5    | left     | proficient            | 50.0 |      | p.Arg127Lys            | 0.12       |      |                 |      |      | p.Gln681Ter              | 0.31       |      |                 |      | 220         | BRCA1, splicing; c.81-1G>A; APC c.3927_3931delAAAGA                          |
| 6    | left     | proficient            | 45.0 |      | p.His109Tyr            | 0.08       |      |                 |      |      |                          |            |      |                 |      | 173         | KRAS p.Gly12Val; TP53 p.Pro190Leu                                            |
| 7    | rectal   | proficient            | 42.5 |      | p.Thr117Met            | 0.11       |      |                 |      |      |                          |            |      |                 |      | 207         | ARID1A; TP53; FBXW7; RNF43; KMT2C; PALB2                                     |
| 8    | left     | proficient            | 35.0 |      |                        |            |      | p.Gln400Ter     | 0.21 |      | p.Pro696Leu              | 0.12       |      |                 |      | 162         | POLE p.Pro286Leu; PALB2 p.Gln1056Ter                                         |
| 9    | right    | proficient            | 30.0 |      |                        |            |      |                 |      |      | splice site c.1760-1G>A  | 0.10       |      |                 |      | 208         | BRCA1 p.Ser988Ter; POLE p.Asp301Asn                                          |
| 10   | right    | proficient            | 55.0 |      |                        |            |      |                 |      |      | p.Arg621Gln              | 0.13       |      |                 |      | 9           | MSH3 p.Ala177Thr                                                             |
| 11   | left     | proficient            | 72.5 |      |                        |            |      |                 |      |      | p.Gln170Ter              | 0.09       |      |                 |      | 30          | none                                                                         |
| 12   | left     | proficient            | 46.3 |      |                        |            |      |                 |      |      | p.Gln193Ter              | 0.47       |      |                 |      | 202         | BRCA1 p.Gly1759Arg; ARID1A p.Gly410Arg; MSH3 p.Trp1111Ter; PALB2 p.Arg753Ter |
| 13   | left     | proficient            | 38.8 |      |                        |            |      |                 |      |      | p.Glu749Ter              | 0.12       |      |                 |      | 13          | POLE p.Pro286Arg; TP53 p.Arg213Ter                                           |
| 14   | left     | proficient            | 51.7 |      |                        |            |      |                 |      |      | p.Gly164Arg              | 0.12       |      |                 |      | 43          | APC p.Lys1308Ter; TP53 p.Tyr234Cys                                           |
| 15   | left     | proficient            | 27.5 |      |                        |            |      |                 |      |      |                          |            |      | p.Trp912Ter     | 0.34 | 160         | POLE p.Ala480Val; ARID1A p.Gly960Glu; NRAS; TP53; SMAD4                      |
| 16   | rectal   | proficient            | 63.3 |      |                        |            |      |                 |      |      |                          |            |      | p.Gln132Ter     | 0.29 | 93          | CDKN2A c.457+1G>A; BRCA2 p.Glu1593Lys; PTEN; NRAS; TP53                      |
| 17   | rectal   | proficient            | 55.0 |      |                        |            |      |                 |      |      |                          |            |      | p.Glu286Lys     | 0.13 | 134         | POLE p.Pro436Ser; TP53 p.Pro27fs; APC p.Glu1309fs                            |
| 18   | right    | deficient             | 45.0 |      |                        |            |      |                 |      |      |                          |            |      |                 |      | 5           | none                                                                         |
| 19   | right    | deficient             | 38.3 |      |                        |            |      |                 |      |      |                          |            |      |                 |      | 8           | KRAS p.Ala146Val                                                             |
| 20   | right    | deficient             | 70.0 |      |                        |            |      |                 |      |      |                          |            |      |                 |      | 9           | ARID1A; CDH1; FBXW7; KRAS; SMAD4                                             |
| 21   | left     | deficient             | 43.3 |      |                        |            |      |                 |      |      |                          |            |      |                 |      | 4           | BRCA2 p.Asp2723Gly                                                           |
| 22   | right    | deficient             | 55.0 |      |                        |            |      |                 |      |      |                          |            |      |                 |      | 25          | APC; KRAS; PIK3CA; TP53                                                      |
| 23   | right    | deficient             | 53.3 |      |                        |            |      |                 |      |      |                          |            |      |                 |      | 3           | APC; KRAS; PIK3CA                                                            |
| 24   | right    | deficient             | 36.7 |      |                        |            |      |                 |      |      |                          |            |      |                 |      | 4           | TP53 p.Arg342Ter                                                             |
| 25   | right    | deficient             | 83.3 |      |                        |            |      |                 |      |      |                          |            |      |                 |      | 4           | CDH1 p.Arg335Ter                                                             |
| 26   | right    | deficient             | 72.5 |      |                        |            |      |                 |      |      |                          |            |      |                 |      | 3           | CDKN1B p.Lys73fs; RNF43 p.Gly659fs                                           |
| 27   | rectal   | deficient             | 50.0 |      |                        |            |      |                 |      |      |                          |            |      |                 |      | 78          | BRCA1 p.Gly1759Arg; BRCA2 p.Arg2659Lys                                       |
| 28   | right    | deficient             | 52.5 |      |                        |            |      |                 |      |      |                          |            |      |                 |      | 5           | BRAF p.Val600Glu; NBN p.Arg89Ter; RNF43 p.Gly659fs                           |
| 29   | right    | deficient             | 66.3 |      |                        |            |      |                 |      |      |                          |            |      |                 |      | 6           | BRAF p.Val600Glu; RNF43 p.Gly659fs                                           |
| 30   | right    | deficient             | 65.0 |      |                        |            |      |                 |      |      |                          |            |      |                 |      | 4           | APC p.Glu1156fs                                                              |
| 31   | right    | deficient             | 70.0 |      |                        |            |      |                 |      |      |                          |            |      |                 |      | 3           | BRAF p.Val600Glu; PTEN p.Gly251Val                                           |
| 32   | left     | deficient             | 71.3 |      |                        |            |      |                 |      |      |                          |            |      |                 |      | 9           | CHEK2 p.Arg95Ter; CTNNB1 p.Ser45Phe                                          |
| 33   | right    | deficient             | 52.5 |      |                        |            |      |                 |      |      |                          |            |      |                 |      | 93          | BRCA1 p.Trp1529Ter; PALB2 p.Gln251Ter; + 9 additional genes                  |
| 34   | right    | deficient             | 38.8 |      |                        |            |      |                 |      |      |                          |            |      |                 |      | 5           | none                                                                         |
| 35   | right    | deficient             | 66.7 |      |                        |            |      |                 |      |      |                          |            |      |                 |      | 4           | ERBB4 p.Pro224His                                                            |

(Continued)

| case | location | MMR status | TCC% | MLH1 | protein variant | VAF | PMS2 | protein variant | VAF | MSH2 | protein variant | VAF | MSH6 | protein variant | VAF | N mutations | other clonal pathogenic                                       |
|------|----------|------------|------|------|-----------------|-----|------|-----------------|-----|------|-----------------|-----|------|-----------------|-----|-------------|---------------------------------------------------------------|
| 36   | right    | deficient  | 57.5 |      |                 |     |      |                 |     |      |                 |     |      |                 |     | 3           | APC p.Arg876Ter;<br>KMT2D p.Arg5501Ter;<br>TP53 p.Arg273Cys   |
| 37   | right    | deficient  | 77.5 |      |                 |     |      |                 |     |      |                 |     |      |                 |     | 1           | BRCA2 p.Asp2723Gly                                            |
| 38   | right    | deficient  | 28.3 |      |                 |     |      |                 |     |      |                 |     |      |                 |     | 6           | RNF43 p.Gly659fs                                              |
| 39   | right    | deficient  | 62.5 |      |                 |     |      |                 |     |      |                 |     |      |                 |     | 3           | BRAF p.Val600Glu;<br>PTEN p.Lys267fs                          |
| 40   | right    | deficient  | 52.5 |      |                 |     |      |                 |     |      |                 |     |      |                 |     | 44          | BRCA1 p.Gln1832Ter                                            |
| 41   | rectal   | deficient  | 60.0 |      |                 |     |      |                 |     |      |                 |     |      |                 |     | 3           | APC p.Ile1557Ter;<br>KRAS p.Gln61His; TP53<br>p.Lys132Asn     |
| 42   | right    | deficient  | 23.8 |      |                 |     |      |                 |     |      |                 |     |      |                 |     | 112         | ARID1A p.Gln403Ter;<br>MYC p.Glu384Lys                        |
| 43   | left     | deficient  | 48.8 |      |                 |     |      |                 |     |      |                 |     |      |                 |     | 5           | NBN p.Asn209fs;<br>RNF43 p.Gly659fs;<br>FBXW7 p.Arg479Gln     |
| 44   | right    | deficient  | 68.8 |      |                 |     |      |                 |     |      |                 |     |      |                 |     | 7           | BRAF p.Val600Glu + 2<br>different PTEN stogains<br>(nonsense) |
| 45   | right    | deficient  | 40.0 |      |                 |     |      |                 |     |      |                 |     |      |                 |     | 6           | TP53 p.Arg213Ter +<br>APC, KRAS, PIK3CA                       |
| 46   | right    | deficient  | 53.3 |      |                 |     |      |                 |     |      |                 |     |      |                 |     | 24          | KRAS p.Gly12Asp                                               |
| 47   | right    | deficient  | 43.8 |      |                 |     |      |                 |     |      |                 |     |      |                 |     | 5           | KRAS p.Gln61His;<br>PIK3CA p.His1047Arg;<br>TP53 p.Leu43Ter   |
| 48   | right    | deficient  | 43.3 |      |                 |     |      |                 |     |      |                 |     |      |                 |     | 6           | KRAS p.Gly12Asp;<br>SMAD4 p.Arg361Ser;<br>TP53 p.Ser127Tyr    |

TCC: tumor cell content; VAF: variant allelic frequency.

**Supplementary Table 4: Clinicopathological, immunophenotypic and genotypic parameters in association with ARID1A and BRCA1 mutations**

| Parameters*                      | ARID1A     |            |              | BRCA1      |            |         |
|----------------------------------|------------|------------|--------------|------------|------------|---------|
|                                  | Wt         | Mut        | p-value      | Wt         | Mut        | p-value |
| <b>Age</b>                       |            |            |              |            |            |         |
| Mean (SD)                        | 63 (10)    | 61 (12)    | 0.390        | 63 (11)    | 62 (11)    | 0.330   |
| Median (IQR)                     | 65 (57-72) | 62 (52-70) |              | 65 (56-72) | 57-69      |         |
| Min-Max                          | 28-81      | 30-79      |              | 28-81      | 28-78      |         |
| <b>Gender</b>                    |            |            |              |            |            |         |
| Female                           | 145 (46.6) | 11 (30.6)  | 0.067        | 138 (45.8) | 18 (39.1)  | 0.394   |
| Male                             | 166 (53.4) | 25 (69.4)  |              | 163 (54.2) | 28 (60.9)  |         |
| <b>Family history of cancer</b>  |            |            |              |            |            |         |
| No                               | 114 (58.8) | 11 (42.3)  | 0.112        | 108 (58.1) | 17 (50.0)  | 0.383   |
| Yes                              | 80 (41.2)  | 15 (57.7)  |              | 78 (41.9)  | 17 (50.0)  |         |
| <b>Stage (excl. I)</b>           |            |            |              |            |            |         |
| II                               | 94 (31.6)  | 13 (37.1)  | 0.511        | 87 (30.3)  | 20 (44.4)  | 0.059   |
| III                              | 203 (68.4) | 22 (62.9)  |              | 200 (69.7) | 25 (55.6)  |         |
| <b>Grade</b>                     |            |            |              |            |            |         |
| G1-G2                            | 238 (79.1) | 28 (80.0)  | 0.898        | 231 (79.1) | 35 (79.5)  | 0.947   |
| G3                               | 63 (20.9)  | 7 (20.0)   |              | 61 (20.9)  | 9 (20.5)   |         |
| <b>Mucinous component</b>        |            |            |              |            |            |         |
| No                               | 213 (74.7) | 17 (51.5)  | <b>0.005</b> | 205 (73.7) | 25 (62.5)  | 0.137   |
| Yes                              | 72 (25.3)  | 16 (48.5)  |              | 73 (26.3)  | 15 (37.5)  |         |
| <b>Perineural invasion</b>       |            |            |              |            |            |         |
| No                               | 248 (84.9) | 32 (88.9)  | 0.526        | 248 (86.4) | 32 (78.0)  | 0.156   |
| Yes                              | 44 (15.1)  | 4 (11.1)   |              | 39 (13.6)  | 9 (22.0)   |         |
| <b>Lymphatic vessel invasion</b> |            |            |              |            |            |         |
| No                               | 226 (77.4) | 29 (80.6)  | 0.667        | 225 (78.4) | 30 (73.2)  | 0.452   |
| Yes                              | 66 (22.6)  | 7 (19.4)   |              | 62 (21.6)  | 11 (26.8)  |         |
| <b>Blood vessel invasion</b>     |            |            |              |            |            |         |
| No                               | 252 (86.6) | 31 (86.1)  | 0.936        | 249 (87.1) | 34 (82.9)  | 0.468   |
| Yes                              | 39 (13.4)  | 5 (13.9)   |              | 37 (12.9)  | 7 (17.1)   |         |
| <b>PNI+/-LVI</b>                 |            |            |              |            |            |         |
| No                               | 191 (65.0) | 26 (72.2)  | 0.386        | 192 (66.4) | 25 (61.0)  | 0.49    |
| Yes                              | 103 (35.0) | 10 (27.8)  |              | 97 (33.6)  | 16 (39.0)  |         |
| <b>CD8 density</b>               |            |            |              |            |            |         |
| High                             | 83 (26.7)  | 13 (36.1)  | 0.232        | 83 (27.6)  | 13 (28.3)  | 0.923   |
| Other                            | 228 (73.3) | 23 (63.9)  |              | 218 (72.4) | 33 (71.7)  |         |
| <b>MMR</b>                       |            |            |              |            |            |         |
| Deficiency                       | 29 (10.8)  | 6 (18.8)   | 0.187        | 31 (12.0)  | 4 (9.8)    | 0.682   |
| Proficiency                      | 239 (89.2) | 26 (81.3)  |              | 228 (88.0) | 37 (90.2)  |         |
| <b>Mutated tumors</b>            |            |            |              |            |            |         |
| No                               | 8 (2.6)    | 0 (0)      | N/A          | 8 (2.7)    | 0 (0)      | N/A     |
| Yes                              | 303 (97.4) | 36 (100.0) |              | 293 (97.3) | 46 (100.0) |         |

(Continued)

| Parameters*                    | ARID1A         |                   |         | BRCA1          |                   |         |
|--------------------------------|----------------|-------------------|---------|----------------|-------------------|---------|
|                                | Wt             | Mut               | p-value | Wt             | Mut               | p-value |
| <b>Mutations per tumor</b>     |                |                   |         |                |                   |         |
| Mean +/- SD                    | 8.3 +/- 20.1   | 73.8 +/- 70.3     | <0.001  | 7.6 +/- 16.5   | 64.2 +/- 71.2     | <0.001  |
| Median (IQR)                   | 4.0 (3.0, 6.0) | 43.5 (8.5, 128.5) |         | 4.0 (3.0, 6.0) | 36.5 (6.0, 126.0) |         |
| Min-Max                        | 0-208          | 3-220             |         | 0-160          | 2-220             |         |
| <b>Pathogenic mutations</b>    |                |                   |         |                |                   |         |
| Mean +/- SD                    | 3.7 +/- 4.3    | 16.0 +/- 12.2     | <0.001  | 3.4 +/- 3.4    | 14.7 +/- 12.9     | <0.001  |
| Median (IQR)                   | 3.0 (2.0, 4.0) | 12.0 (5.0, 25.0)  |         | 3.0 (2.0, 4.0) | 11.0 (4.0, 24.0)  |         |
| Min-Max                        | 0-49           | 2-43              |         | 0-34           | 1-49              |         |
| <b>Mutated genes per tumor</b> |                |                   |         |                |                   |         |
| Mean +/- SD                    | 3.1 +/- 2.8    | 11.1 +/- 7.1      | <0.001  | 3.0 +/- 2.4    | 10.2 +/- 7.5      | <0.001  |
| Median (IQR)                   | 3.0 (2.0, 3.0) | 9.5 (4.5, 16.5)   |         | 3.0 (2.0, 3.0) | 8.0 (3.0, 17.0)   |         |
| Min-Max                        | 0-25           | 2-28              |         | 0-19           | 1-28              |         |
| <b>MMR MUT</b>                 |                |                   |         |                |                   |         |
| No                             | 293 (94.2)     | 27 (75.0)         | <0.001  | 286 (95.0)     | 34 (73.9)         | <0.001  |
| Yes                            | 18 (5.8)       | 9 (25.0)          |         | 15 (5.0)       | 12 (26.1)         |         |
| <b>BRAF</b>                    |                |                   |         |                |                   |         |
| No                             | 289 (92.9)     | 32 (88.9)         | 0.384   | 278 (92.4)     | 43 (93.5)         | 0.788   |
| Yes                            | 22 (7.1)       | 4 (11.1)          |         | 23 (7.6)       | 3 (6.5)           |         |
| <b>ALL RAS</b>                 |                |                   |         |                |                   |         |
| No                             | 141 (45.3)     | 14 (38.9)         | 0.461   | 135 (44.9)     | 20 (43.5)         | 0.862   |
| Yes                            | 170 (54.7)     | 22 (61.1)         |         | 166 (55.1)     | 26 (56.5)         |         |

IQR = Interquartile range, SD standard deviation.

\* analysis performed in informative samples.

**Supplementary Table 5: Prognostic significance of clinicopathological parameters, in the entire cohort and per tumor location (DFS)**

| Parameter                                 | Categories          | Npatients   | Nevents   | HR   | 95% CI    | Wald's p         |
|-------------------------------------------|---------------------|-------------|-----------|------|-----------|------------------|
| <b>Entire cohort</b>                      |                     |             |           |      |           |                  |
| Age (median cut-off)                      | <Median vs. ≥Median | 203 vs. 209 | 51 vs. 62 | 0.82 | 0.56-1.18 | 0.28             |
| Gender                                    | Female vs. Male     | 183 vs. 229 | 45 vs. 68 | 0.79 | 0.54-1.15 | 0.22             |
| <b>Tumor location (Left-Right-Rectal)</b> |                     |             |           |      |           | <b>0.63</b>      |
|                                           | Left vs. right      | 171 vs. 139 | 50 vs. 39 | 1.03 | 0.68-1.56 | 0.9              |
|                                           | Rectal vs. right    | 102 vs. 139 | 24 vs. 39 | 0.82 | 0.49-1.36 | 0.43             |
| <b>Perforation</b>                        | No vs. Yes          | 375 vs. 14  | 102 vs. 5 | 0.68 | 0.28-1.68 | 0.4              |
| <b>Obstruction</b>                        | No vs. Yes          | 345 vs. 45  | 91 vs. 16 | 0.71 | 0.42-1.21 | 0.21             |
| <b>Radiation therapy</b>                  | No vs. Yes          | 279 vs. 84  | 75 vs. 25 | 0.91 | 0.58-1.43 | 0.68             |
| <b>Primary tumor (T)</b>                  |                     |             |           |      |           | <b>0.014</b>     |
|                                           | T1-T2 vs. T4        | 39 vs. 41   | 5 vs. 17  | 0.24 | 0.09-0.65 | 0.005            |
|                                           | T3 vs. T4           | 329 vs. 41  | 90 vs. 17 | 0.59 | 0.35-0.99 | 0.046            |
| <b>Regional lymph nodes (N)</b>           | N0 vs. N1-2         | 151 vs. 249 | 25 vs. 84 | 0.43 | 0.28-0.67 | <b>&lt;0.001</b> |
| <b>Stage (excluding I)</b>                | II vs. III          | 137 vs. 258 | 24 vs. 87 | 0.46 | 0.29-0.72 | <b>0.001</b>     |
| <b>Treatment</b>                          | FOLFOX vs. CAPOX    | 137 vs. 270 | 40 vs. 71 | 1.1  | 0.75-1.62 | 0.63             |
| <b>Grade</b>                              | G1-G2 vs. G3        | 320 vs. 79  | 81 vs. 28 | 0.68 | 0.45-1.05 | 0.083            |
| <b>Mucinous component</b>                 | No vs. Yes          | 273 vs. 102 | 70 vs. 31 | 0.8  | 0.52-1.22 | 0.3              |
| <b>Perineural invasion (PNI)</b>          | No vs. Yes          | 328 vs. 59  | 86 vs. 19 | 0.77 | 0.47-1.27 | 0.3              |
| <b>Lymphatic vessel invasion</b>          | No vs. Yes          | 298 vs. 89  | 78 vs. 28 | 0.84 | 0.54-1.29 | 0.41             |
| <b>Blood vessel invasion</b>              | No vs. Yes          | 332 vs. 54  | 82 vs. 23 | 0.51 | 0.32-0.82 | <b>0.005</b>     |
| <b>PNI+/-LVI</b>                          | No vs. Yes          | 253 vs. 136 | 61 vs. 46 | 0.69 | 0.47-1.02 | <b>0.062</b>     |
| <b>Right (N=139)</b>                      |                     |             |           |      |           |                  |
| Age (median cut-off)                      | <Median vs. ≥Median | 70 vs. 69   | 20 vs. 19 | 1.09 | 0.58-2.04 | 0.79             |
| Gender                                    | Female vs. Male     | 62 vs. 77   | 16 vs. 23 | 0.8  | 0.42-1.51 | 0.49             |
| <b>Perforation</b>                        | No vs. Yes          | 129 vs. 2   | 38 vs. 0  | -    | -         | -                |
| <b>Obstruction</b>                        | No vs. Yes          | 118 vs. 13  | 33 vs. 5  | 0.64 | 0.25-1.63 | 0.35             |
| <b>Radiation therapy</b>                  | No vs. Yes          | 119 vs. 1   | 34 vs. 1  | 0.16 | 0.02-1.18 | 0.072            |
| <b>Primary tumor (T)</b>                  |                     |             |           |      |           | 0.48             |
|                                           | T1-T2 vs. T4        | 8 vs. 14    | 1 vs. 5   | 0.28 | 0.03-2.42 | 0.25             |
|                                           | T3 vs. T4           | 117 vs. 14  | 33 vs. 5  | 0.68 | 0.27-1.76 | 0.43             |
| <b>Regional lymph nodes (N)</b>           | N0 vs. N1-2         | 55 vs. 81   | 9 vs. 30  | 0.36 | 0.17-0.76 | 0.007            |
| <b>Stage (excluding I)</b>                | II vs. III          | 49 vs. 84   | 7 vs. 31  | 0.31 | 0.14-0.70 | 0.005            |
| <b>Treatment</b>                          | FOLFOX vs. XELOX    | 40 vs. 98   | 12 vs. 27 | 1.05 | 0.53-2.08 | 0.88             |
| <b>Grade</b>                              | G1-G2 vs. G3        | 93 vs. 41   | 24 vs. 15 | 0.71 | 0.37-1.36 | 0.3              |
| <b>Mucinous component</b>                 | No vs. Yes          | 84 vs. 41   | 24 vs. 12 | 0.93 | 0.46-1.86 | 0.84             |
| <b>Perineural invasion</b>                | No vs. Yes          | 110 vs. 16  | 30 vs. 6  | 0.68 | 0.28-1.65 | 0.4              |
| <b>Lymphatic vessel invasion</b>          | No vs. Yes          | 92 vs. 34   | 26 vs. 11 | 0.86 | 0.42-1.74 | 0.67             |
| <b>Blood vessel invasion</b>              | No vs. Yes          | 109 vs. 17  | 29 vs. 8  | 0.49 | 0.22-1.07 | 0.072            |
| <b>PNI+/-LVI</b>                          | No vs. Yes          | 78 vs. 49   | 19 vs. 18 | 0.62 | 0.32-1.18 | 0.14             |
| <b>Left (N=171)</b>                       |                     |             |           |      |           |                  |
| Age (median cut-off)                      | <Median vs. ≥Median | 77 vs. 94   | 19 vs. 31 | 0.7  | 0.40-1.24 | 0.22             |
| Gender                                    | Female vs. Male     | 77 vs. 94   | 15 vs. 35 | 0.48 | 0.26-0.87 | 0.017            |
| <b>Perforation</b>                        | No vs. Yes          | 151 vs. 11  | 42 vs. 4  | 0.63 | 0.23-1.77 | 0.39             |
| <b>Obstruction</b>                        | No vs. Yes          | 135 vs. 27  | 36 vs. 10 | 0.73 | 0.36-1.47 | 0.37             |
| <b>Radiation therapy</b>                  | No vs. Yes          | 147 vs. 4   | 40 vs. 2  | 0.47 | 0.11-1.96 | 0.3              |
| <b>Primary tumor (T)</b>                  |                     |             |           |      |           | 0.17             |
|                                           | T1-T2 vs. T4        | 14 vs. 20   | 2 vs. 9   | 0.27 | 0.06-1.25 | 0.094            |
|                                           | T3 vs. T4           | 136 vs. 20  | 38 vs. 9  | 0.58 | 0.28-1.20 | 0.14             |

(Continued)

| Parameter                        | Categories          | Npatients  | Nevents   | HR   | 95% CI    | Wald's p |
|----------------------------------|---------------------|------------|-----------|------|-----------|----------|
| <b>Regional lymph nodes (N)</b>  | N0 vs. N1-2         | 59 vs. 105 | 10 vs. 36 | 0.45 | 0.23-0.92 | 0.027    |
| <b>Stage (excluding I)</b>       | II vs. III          | 54 vs. 110 | 11 vs. 38 | 0.56 | 0.29-1.10 | 0.09     |
| <b>Treatment</b>                 | FOLFOX vs. CAPOX    | 64 vs. 104 | 18 vs. 30 | 1.01 | 0.56-1.80 | 0.98     |
| <b>Grade</b>                     | G1-G2 vs. G3        | 137 vs. 29 | 38 vs. 9  | 0.86 | 0.42-1.79 | 0.69     |
| <b>Mucinous component</b>        | No vs. Yes          | 120 vs. 37 | 31 vs. 13 | 0.7  | 0.37-1.34 | 0.28     |
| <b>Perineural invasion</b>       | No vs. Yes          | 135 vs. 28 | 35 vs. 11 | 0.61 | 0.31-1.19 | 0.15     |
| <b>Lymphatic vessel invasion</b> | No vs. Yes          | 129 vs. 34 | 35 vs. 11 | 0.86 | 0.43-1.69 | 0.65     |
| <b>Blood vessel invasion</b>     | No vs. Yes          | 136 vs. 26 | 33 vs. 12 | 0.47 | 0.24-0.90 | 0.024    |
| <b>PNI+/-LVI</b>                 | No vs. Yes          | 107 vs. 57 | 26 vs. 21 | 0.64 | 0.36-1.15 | 0.13     |
| <b>Rectal (N=102)</b>            |                     |            |           |      |           |          |
| <b>Age (median cut-off)</b>      | <Median vs. ≥Median | 56 vs. 46  | 12 vs. 12 | 0.73 | 0.33-1.64 | 0.45     |
| <b>Gender</b>                    | Female vs. Male     | 44 vs. 58  | 14 vs. 10 | 2.05 | 0.91-4.61 | 0.084    |
| <b>Perforation</b>               | No vs. Yes          | 95 vs. 1   | 22 vs. 1  | 0.12 | 0.01-0.90 | 0.04     |
| <b>Obstruction</b>               | No vs. Yes          | 92 vs. 5   | 22 vs. 1  | 1.12 | 0.15-8.31 | 0.91     |
| <b>Radiation therapy</b>         | No vs. Yes          | 13 vs. 79  | 1 vs. 22  | 0.32 | 0.04-2.36 | 0.26     |
| <b>Primary tumor (T)</b>         |                     |            |           |      |           | 0.17     |
|                                  | T1-T2 vs. T4        | 17 vs. 7   | 2 vs. 3   | 0.18 | 0.03-1.07 | 0.06     |
|                                  | T3 vs. T4           | 76 vs. 7   | 19 vs. 3  | 0.45 | 0.13-1.53 | 0.2      |
| <b>Regional lymph nodes (N)</b>  | N0 vs. N1-2         | 37 vs. 63  | 6 vs. 18  | 0.5  | 0.20-1.27 | 0.15     |
| <b>Stage (excluding I)</b>       | II vs. III          | 34 vs. 64  | 6 vs. 18  | 0.55 | 0.22-1.40 | 0.21     |
| <b>Treatment</b>                 | FOLFOX vs. XELOX    | 33 vs. 68  | 10 vs. 14 | 1.41 | 0.63-3.18 | 0.4      |
| <b>Grade</b>                     | G1-G2 vs. G3        | 90 vs. 9   | 19 vs. 4  | 0.42 | 0.14-1.23 | 0.11     |
| <b>Mucinous component</b>        | No vs. Yes          | 69 vs. 24  | 15 vs. 6  | 0.83 | 0.32-2.14 | 0.7      |
| <b>Perineural invasion</b>       | No vs. Yes          | 83 vs. 15  | 21 vs. 2  | 1.99 | 0.47-8.48 | 0.35     |
| <b>Lymphatic vessel invasion</b> | No vs. Yes          | 77 vs. 21  | 17 vs. 6  | 0.82 | 0.32-2.09 | 0.68     |
| <b>Blood vessel invasion</b>     | No vs. Yes          | 87 vs. 11  | 20 vs. 3  | 0.74 | 0.22-2.51 | 0.63     |
| <b>PNI+/-LVI</b>                 | No vs. Yes          | 68 vs. 30  | 16 vs. 7  | 1.05 | 0.43-2.54 | 0.92     |



**Supplementary Table 6: Multivariate analysis of clinical parameters (DFS)**

| <b>Parameter</b>      | <b>Categories</b> | <b>N patients</b> | <b>N events</b> | <b>HR</b> | <b>95% CI</b> | <b>p-value</b> |
|-----------------------|-------------------|-------------------|-----------------|-----------|---------------|----------------|
| Stage                 | II vs. III        | 129 vs. 234       | 22 vs. 79       | 0.46      | 0.28-0.74     | <b>0.001</b>   |
| Grade                 | G1-G2 vs. G3      | 294 vs. 69        | 74 vs. 27       | 0.71      | 0.45-1.12     | 0.14           |
| Blood vessel invasion | No vs. Yes        | 311 vs. 52        | 79 vs. 22       | 0.6       | 0.37-0.97     | <b>0.037</b>   |
| Tumor site            | Left vs. right    | 154 vs. 117       | 43 vs. 36       | 0.85      | 0.54-1.33     | 0.46           |
|                       | Rectal vs. right  | 92 vs. 117        | 22 vs. 36       | 0.8       | 0.46-1.38     | 0.8            |

**Supplementary Table 7: Prognostic significance of molecular parameters, in the entire cohort and per tumor location (DFS)**

See Supplementary File 1

**Supplementary Table 8: 59-gene panel**

See Supplementary File 2
